# Supplementary material for: Retinoic Acid Receptor Is a Novel Therapeutic Target for Postoperative Cognitive Dysfunction
Source: MDPI journal article supplement (doi:10.3390/pharmaceutics15092311), 2023-09-13
Supplement: s1 [file s1]

**Table S1.** Details of POCD landmark genes for the establishment of CMap model of POCD.

| Genes<br>symbol | Alteration<br>in POCD | Summary of Gene Function or Product                                                                                                       |
|-----------------|-----------------------|-------------------------------------------------------------------------------------------------------------------------------------------|
| VNN1            | Up                    | One of Vanin family protein involved in hematopoietic cell trafficking and enables pantetheine hydrolase activity                         |
| LY6G5C          | Up                    | A lymphocyte antigen 6 family member involved in identical protein binding                                                                |
| NEK3            | Up                    | NIMA related kinase 3 involved in phosphorylation of VAV2 guanine nucleotide exchange factor, paxillin, and activation of the RAC1 GTPase |
| ZFYVE16         | Up                    | Zinc finger FYVE-type protein involved in membrane trafficking in the endosome                                                            |
| ITFG1           | Up                    | Located in extracellular exosome                                                                                                          |
| HDAC5           | Up                    | Histone deacetylase involved in alteration of chromosome structure and transcription factor access to DNA                                 |
| CRYZ            | Up                    | Taxon-specific crystallin protein with NADPH-dependent quinone reductase activity                                                         |
| NPY1R           | Up                    | A G-protein-coupled receptor superfamily involved in function of neuropeptide Y and peptide YY                                            |
| VPS41           | Up                    | Human ortholog of yeast Vps41 protein involved in the formation and fusion of transport vesicles from the Golgi                           |
| CUL5            | Up                    | Cullin involved in ubiquitin protein ligase binding activity                                                                              |
| EHMT1           | Up                    | A histone methyltransferase involved in cell cycle transition                                                                             |
| ARL15           | Up                    | Predicted to enable GTP binding activity and GTPase activity and located in extracellular exosome                                         |
| MAP4K5          | Up                    | A member of the serine/threonine protein kinase involved in activate Jun kinase and function in stress response                           |
| TBXAS1          | Up                    | Thromboxane A synthase involved in pathophysiological processes like hemostasis, cardiovascular disease, and stroke                       |
| DAZL            | Down                  | Potential RNA binding proteins that are expressed in prenatal and postnatal germ cells of males and females                               |
| ZFR             | Down                  | RNA-binding protein involved in nucleocytoplasmic shuttling of another RNA-binding protein, Staufen homolog 2, in neurons                 |
| RTF1            | Down                  | Gene locus involved in regulation of transcription elongation and chromatin remodeling                                                    |
| NAA15           | Down                  | Auxillary subunit of the N-terminal acetyltransferase A complex involved in the acetyl group transfer on nascent polypeptides             |
| SMARCE1         | Down                  | Part of SWI/SNF complex involved in transcriptional activation of genes normally repressed by chromatin                                   |
| MXI1            | Down                  | Oncogenic transcription factor involved in negatively regulate MYC function                                                               |
| OXSRI           | Down                  | Ser/Thr protein kinase family of proteins involved in response to environmental stress and regulating actin cytoskeleton                  |
| RPL39L          | Down                  | Encode a protein sharing high sequence similarity with ribosomal protein L39                                                              |
| CAND1           | Down                  | Regulator of Cullin-RING ubiquitin ligases involved in ubiquitinylation of proteins degraded by the Ub proteasome system                  |
| OR1E1           | Down                  | Olfactory receptors involved in neuronal response to perception of smells                                                                 |
| OLFML2B         | Down                  | Olfactomedin domain-containing protein                                                                                                    |
| PPP5C           | Down                  | Serine/threonine phosphatase involved in response to hormones or cellular stress and breast cancer development                            |
| PARL            | Down                  | Intramembrane serine proteases involved in mitochondrial remodeling and apoptosis                                                         |
| POLR2K          | Down                  | Subunits of RNA polymerase II involved in synthesizing messenger RNA in eukaryotes                                                        |

|         |      |                                                                                                                                                                                |
|---------|------|--------------------------------------------------------------------------------------------------------------------------------------------------------------------------------|
| PRPF3   | Down | Pre-mRNA processing factor 3 involved in retinitis pigmentosa-18                                                                                                               |
| PSG5    | Down | Pregnancy-specific glycoproteins mainly produced by the placental syncytiotrophoblasts during pregnancy                                                                        |
| WNK1    | Down | WNK subfamily of serine/threonine protein kinases involved in the transport of sodium and chloride ions as blood pressure regulator                                            |
| EIF2AK2 | Down | Serine/threonine protein kinase involved in innate immune response against multiple DNA and RNA viruses                                                                        |
| BMP2K   | Down | human homolog of mouse BMP-2-inducible kinase involved in skeletal development and patterning                                                                                  |
| RPL26L1 | Down | Alternative splicing results in multiple transcript variants encoding the same protein                                                                                         |
| ARHGEF6 | Down | Cytoplasmic protein that activates the Ras-like family involved in Rho-dependent signals                                                                                       |
| U2SURP  | Down | Enables RNA binding activity                                                                                                                                                   |
| DNAJC13 | Down | Dnaj protein family member involved in clathrin-mediated endocytosis                                                                                                           |
| SMC4    | Down | Involved in changes in chromosome structure during mitotic segregation of chromosomes                                                                                          |
| ATP9B   | Down | Predicted to enable ATPase-coupled intramembrane lipid transporter activity                                                                                                    |
| DDX6    | Down | A DEAD box protein family member involved in translation suppression, mRNA degradation and microRNA-induced gene silencing                                                     |
| DNASE2B | Down | Share considerable sequence similarity to and is structurally related to DNase II                                                                                              |
| SREK1   | Down | Serine/arginine-rich (SR) splicing protein interacted with other SR proteins to modulate splice site selection                                                                 |
| NPIPA1  | Down | Predicted to be involved in mRNA transport and protein transport                                                                                                               |
| OAT     | Down | Mitochondrial enzyme ornithine aminotransferase involved in converting arginine and ornithine into the major excitatory and inhibitory neurotransmitters glutamate and GABA    |
| CDKL1   | Down | A CDC2-related serine/threonine protein kinases member involved in accumulating primarily in the nucleus                                                                       |
| USP15   | Down | A USP family member involved in transforming growth factor beta signalling through deubiquitination of receptor-activated SMAD transcription factors                           |
| SEC24B  | Down | A cargo-binding component of the COPII vesicle involved in the transport of secretory proteins from the endoplasmic reticulum to the Golgi apparatus                           |
| ATXN2   | Down | Encoded cytoplasmic protein is involved in endocytosis, and modulates mTOR signals, modifying ribosomal translation and mitochondrial function                                 |
| PIP5K1A | Down | Enables 1-phosphatidylinositol-4-phosphate 5-kinase activity and kinase binding activity                                                                                       |
| CKS1B   | Down | Bind to the catalytic subunit of the cyclin dependent kinases and involved in their biological function                                                                        |
| SEN6    | Down | Remove the tail sequences of the UBL precursors and display isopeptidase activity for deconjugation of SUMO-conjugated substrates                                              |
| HNRNPC  | Down | Act as a tetramer and is involved in the assembly of 40S hnRNP particles                                                                                                       |
| HMG2    | Down | Bind nucleosomal DNA and is associated with transcriptionally active chromatin                                                                                                 |
| UFM1    | Down | A ubiquitin-like protein that is conjugated to target proteins by E1-like activating enzyme UBA5 and E2-like conjugating enzyme UFC1                                           |
| GPR65   | Down | Enables G protein-coupled receptor activity and involved in actin cytoskeleton reorganization; activation of GTPase activity; and positive regulation of stress fiber assembly |
